# Supplementary material for: No difference in hepatocellular carcinoma risk in chronic hepatitis B patients treated with tenofovir vs entecavir: evidence from an updated meta-analysis
Source: publisher site journal article supplement (doi:10.18632/aging.202573), 2021-02-26
Supplement: Supplementary file [file aging-v13i5-202573-supplementary-material-SD2.pdf]

## SUPPLEMENTARY TABLE

**Supplementary Table 1. Excluded studies after checking the full text and primary reason for exclusion.**

| Author                       | Year | Study description                                                                                                                                                                                                                                                                                             | Primary reason for exclusion                         |
|------------------------------|------|---------------------------------------------------------------------------------------------------------------------------------------------------------------------------------------------------------------------------------------------------------------------------------------------------------------|------------------------------------------------------|
| Pol et al. [1]               | 2019 | This prospective study found that the risk of liver-related events was not different between tenofovir and entecavir group. However, the study was published in the form of conference abstract.                                                                                                              | Conference abstract                                  |
| Lee et al. [2]               | 2019 | This propensity score analysis compared the effect of tenofovir and entecavir on the risk of hepatocellular carcinoma and liver-related events in patients with CHB. It is noteworthy that this study is published in the form of conference abstract and is a duplicate report of an included study [3].     | Duplicate report of included study                   |
| Le et al. [4]                | 2019 | This is a multicenter retrospective cohort study of CHB patients; its primary purpose was to evaluate the long-term safety and efficacy of tenofovir and entecavir. This study reported the number of patients diagnosed with liver cancer in tenofovir and entecavir groups but not adjusted risk estimates. | Adjusted risk estimates were not available           |
| Kim et al. [5]               | 2019 | This study is a retrospective cohort study, and found that treatment with tenofovir was associated with a reduced risk of HCC compared with treatment with entecavir. However, the study was published in the form of conference abstract.                                                                    | Conference abstract                                  |
| Gordon et al. [6]            | 2019 | This prospective cohort study suggested that the risk of HCC in patients treated with tenofovir versus entecavir might vary by race group. However, the study was published in the form of conference abstract.                                                                                               | Conference abstract                                  |
| Lee et al. [7]               | 2018 | This longitudinal observational analysis compared the risk of developing HCC in treatment-naïve CHB patients and provided the relevant hazard ratio. Of note, this study is published in the form of conference abstract and is a duplicate report of an included study [8].                                  | Duplicate report of included study                   |
| Kim et al. [9]               | 2018 | This retrospective study reported the annual incidence of HCC in tenofovir and entecavir groups (0.85% versus 1.27%), with 3 cases in tenofovir group (3/112, 2.7%) and 13 in entecavir group (13/191, 6.8%). However, it failed to provide the relevant adjusted risk estimates.                             | Adjusted risk estimates were not available           |
| Ha et al. [10]               | 2018 | This study is a retrospective cohort study, and found that there was no difference in risk reduction of HCC between tenofovir and entecavir. However, the study was published in the form of conference abstract. Also, this study is a duplicate report of an included study [11].                           | Conference abstract                                  |
| Tsai et al. [12]             | 2017 | This follow-up study documented a total of 56 HCC cases in a cohort of 546 CHB patients with cirrhosis on nucleos(t)ide analog therapy. The authors did not report the relevant adjusted risk estimates of developing HCC.                                                                                    | Adjusted risk estimates were not available           |
| Riveiro-Barciela et al. [13] | 2017 | This study aimed to assess the effectiveness and safety of tenofovir or entecavir in CHB patients. The authors provided the number of HCC cases in tenofovir and entecavir groups (11 in tenofovir group and 3 in entecavir group) but not the corresponding adjusted risk estimates.                         | Adjusted risk estimates were not available           |
| Papatheodoridis et al. [14]  | 2017 | This is a multicenter cohort study involving 1951 CHB patients. The primary aim of the study was to determine the HCC incidence in patients receiving tenofovir or entecavir treatment. The authors only reported the overall HCC incidence in their study population.                                        | Overall HCC incidence in the whole study population. |
| Choi et al. [15]             | 2017 | This cohort study found that tenofovir treatment conferred a reduced risk of HCC but a similar risk death or transplantation compared with entecavir treatment. However, the study was published in the form of conference abstract.                                                                          | Conference abstract                                  |
| Kramer et al. [16]           | 2015 | This study examined the effect of tenofovir versus entecavir on the risk of HCC in CHB patients. However, the authors did not exclude patients with HIV/HCV infection.                                                                                                                                        | Including patients with HIV/HCV infection.           |
| Idilman et al. [17]          | 2015 | This study documented a total of 17 HCC cases in a cohort of 355 CHB patients and showed that there was no significant difference in HCC incidence between tenofovir and entecavir groups. Importantly, the authors did not provide the relevant adjusted risk estimates of developing HCC.                   | Adjusted risk estimates were not available.          |
| Goyal et al. [18]            | 2015 | This study aimed to evaluate the efficacy and outcome of CHB patients receiving                                                                                                                                                                                                                               | Adjusted risk estimates                              |

|                            |      |                                                                                                                                                                                                                                                                                                                                                                                                                                                               |                                             |
|----------------------------|------|---------------------------------------------------------------------------------------------------------------------------------------------------------------------------------------------------------------------------------------------------------------------------------------------------------------------------------------------------------------------------------------------------------------------------------------------------------------|---------------------------------------------|
|                            |      | tenofovir and entecavir treatment. The study showed that 6 patients in tenofovir group and 4 patients in entecavir group developed HCC during follow up. Note that the authors did not provide the relevant adjusted risk estimates.                                                                                                                                                                                                                          | were not available.                         |
| Hsu et al. [19]            | 2014 | This study included a total of 210 CHB patients receiving antiviral treatment (lamivudine, telbivudine, entecavir, and tenofovir). During a median follow-up of 25.2 months, the authors observed 35 HCC cases (1 in lamivudine group, 2 in telbivudine group, and 32 in entecavir group). It is noteworthy that the authors did not provide the relevant adjusted risk estimates.                                                                            | Adjusted risk estimates were not available. |
| Hanumantharaya et al. [20] | 2014 | This study included a total of 132 CHB patients on antiviral treatment (84 receiving tenofovir and 48 receiving entecavir). The authors only reported the number of HCC cases in tenofovir and entecavir groups (2 patients in tenofovir group and 2 patients in entecavir group) but not the relevant adjusted risk estimates.                                                                                                                               | Adjusted risk estimates were not available. |
| Coffin et al. [21]         | 2014 | The study aimed to determine the HCC incidence of HCC in CHB patients receiving nucleos(t)ide analogues treatment. The study documented a total of 11 HCC cases over a median follow-up of 3.2 years, with 1 in entecavir group (1/127) and 3 in tenofovir group (3/132). The authors revealed that the annual incidence of HCC in the study cohort was 0.9% per year. However, importantly, the authors did not report the relevant adjusted risk estimates. | Adjusted risk estimates were not available  |
| Koklu et al. [22]          | 2013 | This is a retrospective analysis of 227 CHB patients, with 72 patients receiving tenofovir and 77 patients receiving entecavir. The authors reported the number of HCC cases in tenofovir- and entecavir-treated patients (2 in tenofovir group and 4 in entecavir group). The authors did not provide the relevant adjusted risk estimates.                                                                                                                  | Adjusted risk estimates were not available  |

Note that the reference numbers in Supplementary Table 2 refer to the reference list presented below.

## REFERENCES

- Pol, Stanislas. Tenofovir versus entecavir in HBV chronic infection: impact on HCC and other liver-related complications occurrences. Paper presented at: Hepatology. 2019.
- Lee SW, Kwon JH, Lee HL, Yoo SH, Nam HC, Sung PS, Nam SW, Bae SH, Choi JY, Yoon SK, Han NI, Jang JW. Comparison of tenofovir and entecavir on the risk of hepatocellular carcinoma and liver-related events in patients with chronic hepatitis B: A propensity score analysis. *J Hepatol.* 2019;70:472.
- Lee SW, Kwon JH, Lee HL, Yoo SH, Nam HC, Sung PS, Nam SW, Bae SH, Choi JY, Yoon SK, Han NI, Jang JW. Comparison of tenofovir and entecavir on the risk of hepatocellular carcinoma and mortality in treatment-naïve patients with chronic hepatitis B in Korea: a large-scale, propensity score analysis. *Gut.* 2020; 69:1301–08. <https://doi.org/10.1136/gutjnl-2019-318947> PMID:31672838
- Le S, Ratnam D, Van Leest R, Kemp W, Roberts S, Nicoll A, Gow P, Bell S, Sood S, Arachchi N, Lubel J, Ryan M, Howell J, et al. Real-world efficacy of long-term entecavir and tenofovir in patients with chronic hepatitis B. *J Gastroenterol Hepatol.* 2019; 34:95.
- Kim W, Telep L, Lu M, Ramroth H, Flaherty JF, Gaggar A, Chokkalingam A, Gordon SC. Risk of incident hepatocellular carcinoma in hepatitis B-infected patients treated with tenofovir disoproxil fumarate versus entecavir: a US administrative claims analysis. Paper presented at: Hepatology. 2019. <https://doi.org/10.1136/gutjnl-2020-IDDF.140>
- Gordon SC, Zhou Y, Li J, Rupp LB, Boscarino JA, Daida YG, Schmidt MA, Trudeau S, Lu M. Effect of treatment of hepatitis B patients with tenofovir disoproxil or entecavir on risk of hepatocellular cancer death in a U.S. Cohort. *J Hepatol.* 2019; 70:e147. [https://doi.org/10.1016/S0618-8278\(19\)30259-2](https://doi.org/10.1016/S0618-8278(19)30259-2)
- Lee SB, Bang SJ, Shin JW, Park NH, Lee H, Lee BU, Park JH, Kim BG, Jung SW, Jeong ID. Mortality, liver transplantation, and hepatic complications in patients with treatment-naïve chronic hepatitis B treated with entecavir vs tenofovir. *Hepatol Int.* 2018;12:S324-S325.
- Kim BG, Park NH, Lee SB, Lee H, Lee BU, Park JH, Jung SW, Jeong ID, Bang SJ, Shin JW. Mortality, liver transplantation and hepatic complications in patients with treatment-naïve chronic hepatitis B treated with entecavir vs tenofovir. *J Viral Hepat.* 2018; 25:1565–75. <https://doi.org/10.1111/jvh.12971> PMID:29998592
- Kim YM, Shin HP, Lee JI, Joo KR, Cha JM, Jeon JW, Yoon JY, Kwak MS. Real-world single-center experience with entecavir and tenofovir disoproxil fumarate in treatment-naïve and experienced patients with chronic hepatitis B. *Saudi J Gastroenterol.* 2018; 24:326–35. [https://doi.org/10.4103/sjg.SJG\\_49\\_18](https://doi.org/10.4103/sjg.SJG_49_18) PMID:30004042
- Ha I, Jang ES, Jeong SH, Kim JW. Entecavir and tenofovir have comparable effect on the risk for

- hepatocellular carcinoma in chronic hepatitis B: Propensity score matching analysis. *Hepatology*. 2018; 68:845A.
11. Ha I, Chung JW, Jang ES, Jeong SH, Kim JW. Comparison of the on-treatment risks for hepatocellular carcinoma between entecavir and tenofovir: a propensity score matching analysis. *J Gastroenterol Hepatol*. 2020; 35:1774–81.  
<https://doi.org/10.1111/jgh.15031> PMID:[32154938](https://pubmed.ncbi.nlm.nih.gov/32154938/)
  12. Tsai MC, Chen CH, Hu TH, Lu SN, Lee CM, Wang JH, Hung CH. Long-term outcomes of hepatitis B virus-related cirrhosis treated with nucleos(t)ide analogs. *J Formos Med Assoc*. 2017; 116:512–21.  
<https://doi.org/10.1016/j.jfma.2016.08.006> PMID:[27720344](https://pubmed.ncbi.nlm.nih.gov/27720344/)
  13. Riveiro-Barciela M, Tabernero D, Calleja JL, Lens S, Manzano ML, Rodríguez FG, Crespo J, Piqueras B, Pascasio JM, Comas C, Gutierrez ML, Aguirre A, Suárez E, et al. Effectiveness and safety of entecavir or tenofovir in a spanish cohort of chronic hepatitis B patients: validation of the page-B score to predict hepatocellular carcinoma. *Dig Dis Sci*. 2017; 62:784–93.  
<https://doi.org/10.1007/s10620-017-4448-7> PMID:[28078526](https://pubmed.ncbi.nlm.nih.gov/28078526/)
  14. Papatheodoridis GV, Idilman R, Dalekos GN, Buti M, Chi H, van Boemmel F, Calleja JL, Sypsa V, Goulis J, Manolakopoulos S, Loglio A, Siakavellas S, Keskin O, et al. The risk of hepatocellular carcinoma decreases after the first 5 years of entecavir or tenofovir in caucasians with chronic hepatitis B. *Hepatology*. 2017; 66:1444–53.  
<https://doi.org/10.1002/hep.29320> PMID:[28622419](https://pubmed.ncbi.nlm.nih.gov/28622419/)
  15. Choi J, Kim HJ, Lee J, Cho S, Ko MJ, Lim YS. Risk of Hepatocellular Carcinoma in Patients Treated With Entecavir vs Tenofovir for Chronic Hepatitis B: A Korean Nationwide Cohort Study. *JAMA Oncol*. 2019; 5:30–36.  
<https://doi.org/10.1001/jamaoncol.2018.4070> PMID:[30267080](https://pubmed.ncbi.nlm.nih.gov/30267080/)
  16. Kramer JR, Mittal S, Richardson P, El-Serag HB, Kanwal F. Comparative effectiveness of tenofovir vs. Entecavir in reducing the risk of hepatocellular carcinoma in a U.S. Cohort of patients with chronic Hepatitis B virus infection. *Hepatology*. 2015; 62:335A–336A.
  17. Idilman R, Gunsar F, Koruk M, Keskin O, Meral CE, Gulsen M, Elhan AH, Akarca US, Yurdaydin C. Long-term entecavir or tenofovir disoproxil fumarate therapy in treatment-naïve chronic hepatitis B patients in the real-world setting. *J Viral Hepat*. 2015; 22:504–10.  
<https://doi.org/10.1111/jvh.12358> PMID:[25431108](https://pubmed.ncbi.nlm.nih.gov/25431108/)
  18. Goyal SK, Dixit VK, Shukla SK, Ghosh J, Behera M, Tripathi M, Gupta N, Ranjan A, Jain AK. Prolonged use of tenofovir and entecavir in hepatitis B virus-related cirrhosis. *Indian J Gastroenterol*. 2015; 34:286–91.  
<https://doi.org/10.1007/s12664-015-0576-1> PMID:[26243587](https://pubmed.ncbi.nlm.nih.gov/26243587/)
  19. Hsu YC, Wu CY, Lane HY, Chang CY, Tai CM, Tseng CH, Lo GH, Perng DS, Lin JT, Mo LR. Determinants of hepatocellular carcinoma in cirrhotic patients treated with nucleos(t)ide analogues for chronic hepatitis B. *J Antimicrob Chemother*. 2014; 69:1920–27.  
<https://doi.org/10.1093/jac/dku041> PMID:[24576950](https://pubmed.ncbi.nlm.nih.gov/24576950/)
  20. Hanumantharaya DK, Khan R, Wilkinson M, Wong T, Tritto G. Tenofovir and entecavir in the treatment of chronic hepatitis B: Effectiveness and safety in a single centre experience. *Gut*. 2014;63:A244.  
<https://doi.org/10.1136/gutjnl-2014-307263.525>
  21. Coffin CS, Rezaeeaval M, Pang JX, Alcantara L, Klein P, Burak KW, Myers RP. The incidence of hepatocellular carcinoma is reduced in patients with chronic hepatitis B on long-term nucleos(t)ide analogue therapy. *Aliment Pharmacol Ther*. 2014; 40:1262–69.  
<https://doi.org/10.1111/apt.12990> PMID:[25312649](https://pubmed.ncbi.nlm.nih.gov/25312649/)
  22. Köklü S, Tuna Y, Gülşen MT, Demir M, Köksal AŞ, Koçkar MC, Aygün C, Coban S, Ozdil K, Ataseven H, Akin E, Pürnak T, Yüksel I, et al. Long-term efficacy and safety of lamivudine, entecavir, and tenofovir for treatment of hepatitis B virus-related cirrhosis. *Clin Gastroenterol Hepatol*. 2013; 11:88–94.  
<https://doi.org/10.1016/j.cgh.2012.10.003> PMID:[23063679](https://pubmed.ncbi.nlm.nih.gov/23063679/)
