# Supplementary material for: No difference in hepatocellular carcinoma risk in chronic hepatitis B patients treated with tenofovir vs entecavir: evidence from an updated meta-analysis
Source: publisher site journal article supplement (doi:10.18632/aging.202573), 2021-02-26
Supplement: Supplementary file [file aging-v13i5-202573-supplementary-material-SD4.pdf]

## SUPPLEMENTARY TABLE

**Supplementary Table 3. Results of quality assessment of included studies.**

| Study                                                | Selection                             |                                  |                         | Comparability          |                             | Outcome             |                            | Total score |                                |
|------------------------------------------------------|---------------------------------------|----------------------------------|-------------------------|------------------------|-----------------------------|---------------------|----------------------------|-------------|--------------------------------|
|                                                      | Representativeness of exposed cohort★ | Selection of non-exposed cohort★ | Exposure ascertainment★ | No history of disease★ | Comparable on confounders★★ | Outcome assessment★ | Adequate follow-up (≥10y)★ |             | Loss to follow-up rate (≤20%)★ |
| Ha et al. (2020) [33]                                |                                       | ★                                | ★                       | ★                      | ★                           |                     | ★                          | ★           | 6                              |
| Hu et al. (2020) [32]                                |                                       | ★                                | ★                       | ★                      | ★                           |                     | ★                          | ★           | 6                              |
| Su et al. (2020) [19]                                | ★                                     | ★                                | ★                       | ★                      | ★                           | ★                   | ★                          | ★           | 8                              |
| Shin et al. (2020) [31]                              | ★                                     | ★                                | ★                       | ★                      | ★                           | ★                   | ★                          | ★           | 8                              |
| Papatheodoridis et al. (2020) [18]                   | ★                                     | ★                                | ★                       | ★                      | ★                           | ★                   |                            | ★           | 7                              |
| Oh et al. (2020) [17]                                |                                       | ★                                | ★                       | ★                      | ★                           | ★                   | ★                          | ★           | 7                              |
| Ha et al. (2002) [16]                                |                                       | ★                                | ★                       | ★                      | ★                           |                     | ★                          | ★           | 6                              |
| Lee et al. (2019) [10]                               |                                       | ★                                | ★                       | ★                      | ★                           | ★                   | ★                          | ★           | 7                              |
| Kim et al. (2019) [11]                               |                                       | ★                                | ★                       | ★                      | ★                           |                     | ★                          | ★           | 6                              |
| Hsu et al. (2019) [12]                               | ★                                     | ★                                | ★                       | ★                      | ★                           |                     | ★                          | ★           | 7                              |
| Choi et al. (nationwide cohort) (2019) [15]          | ★                                     | ★                                | ★                       | ★                      | ★                           | ★                   | ★                          | ★           | 8                              |
| Choi et al. (validation hospital cohort) (2019) [15] |                                       | ★                                | ★                       | ★                      | ★                           | ★                   | ★                          | ★           | 7                              |
| Yip et al. (2019) [14]                               | ★                                     | ★                                | ★                       | ★                      | ★                           | ★                   | ★                          | ★           | 8                              |
| Kim et al. (2018) [13]                               |                                       | ★                                | ★                       | ★                      | ★                           |                     | ★                          | ★           | 6                              |

Note that the reference numbers refer to the reference list in the main article.
